# Supplementary material for: Regulation of ssb Gene Expression in Escherichia coli
Source: MDPI journal article supplement (doi:10.3390/ijms231810917), 2022-09-18
Supplement: s1 [file s1]

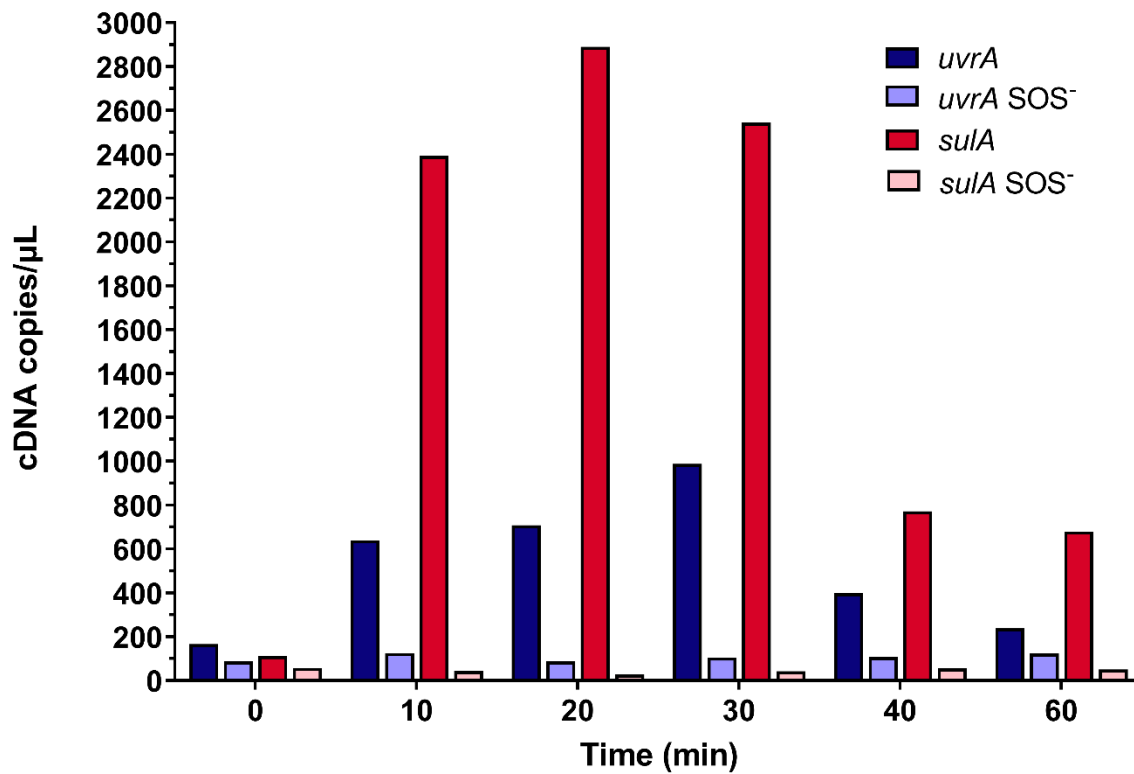

**Supplementary Figure S1.** Absolute quantification of expression of the *uvrA* and the *sulA* gene in *E. coli* UV-irradiated with 40 Jm<sup>-2</sup> and incubated at 37 °C. Bars at time 0 represent unirradiated control. Three independent ddPCR experiments at three different concentrations gave the same relative results (the presented results are with 6 ng cDNA/sample). Poisson confidence interval at a 95% level is < 1%.
